# Supplementary material for: Regulating the anticancer properties of organometallic dendrimers using pyridylferrocene entities: synthesis, cytotoxicity and DNA binding studies
Source: Royal Society of Chemistry journal article supplement (doi:10.1039/c6dt00849f), 2016-01-01

**Regulating the anticancer properties of organometallic  
dendrimers using pyridylferrocene entities: Synthesis,  
cytotoxicity and DNA binding studies.**

Preshendren Govender,<sup>a</sup> Tina Riedel,<sup>b</sup> Paul J. Dyson,<sup>b</sup> and Gregory S. Smith<sup>\*,a</sup>

<sup>a</sup> Department of Chemistry, University of Cape Town, Rondebosch, 7701, Cape Town, South Africa.

<sup>b</sup> Institut des Sciences et Ingénierie Chimique, Ecole Polytechnique Fédérale de Lausanne (EPFL), CH-1015, Lausanne, Switzerland.

**Supplementary Data**

---

\*Corresponding author: Tel.: +27 21 6505279; Fax: +27 21 6505195.

Email address: [Gregory.Smith@uct.ac.za](mailto:Gregory.Smith@uct.ac.za) (Gregory Smith)

***<sup>1</sup>H-NMR spectra of selected metallodendrimers and their binuclear model complexes:***

**Figure S1:** <sup>1</sup>H NMR spectrum of [1][PF<sub>6</sub>]<sub>4</sub> in acetone-*d*<sub>6</sub>.

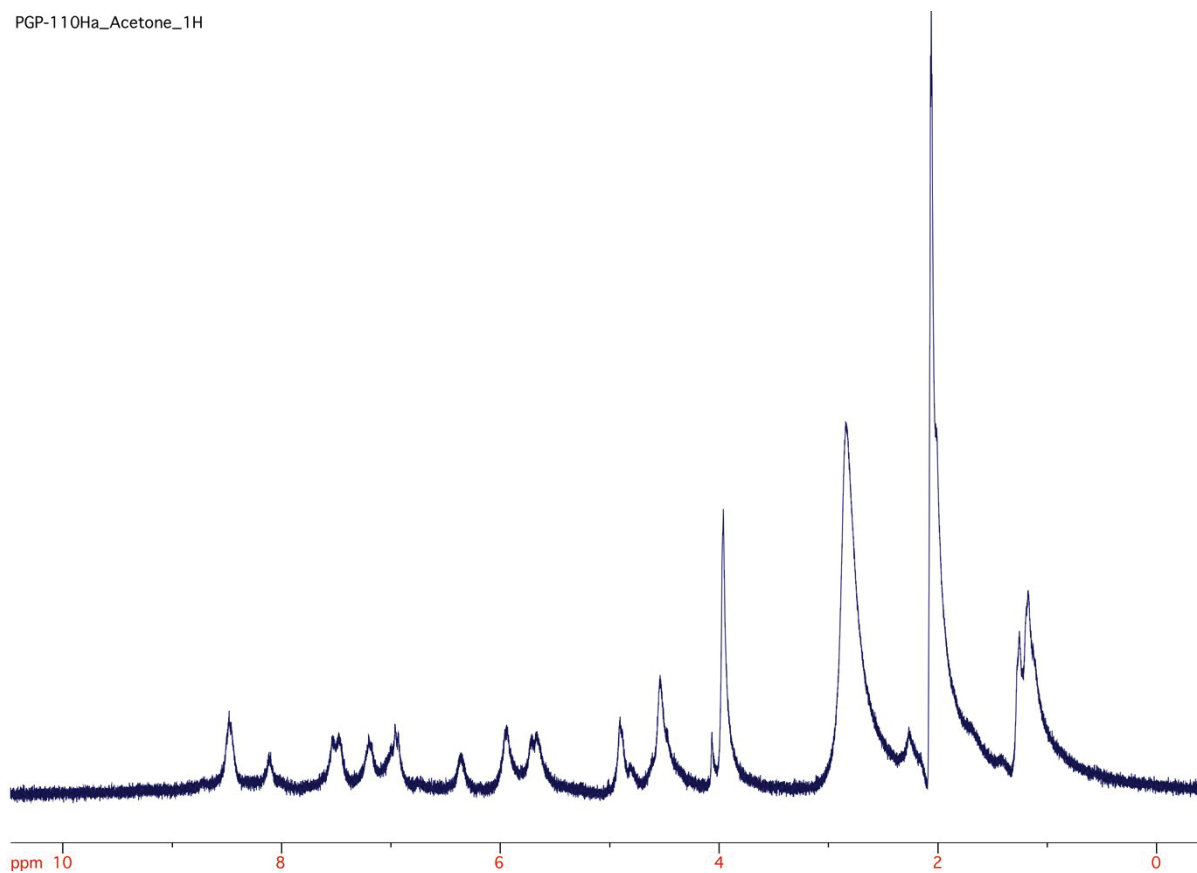

**Figure S2:**  $^1\text{H}$  NMR spectrum of  $[\mathbf{3}][\text{PF}_6]_4$  in acetone- $d_6$ .

PGP-107Ha\_Acetone\_1H

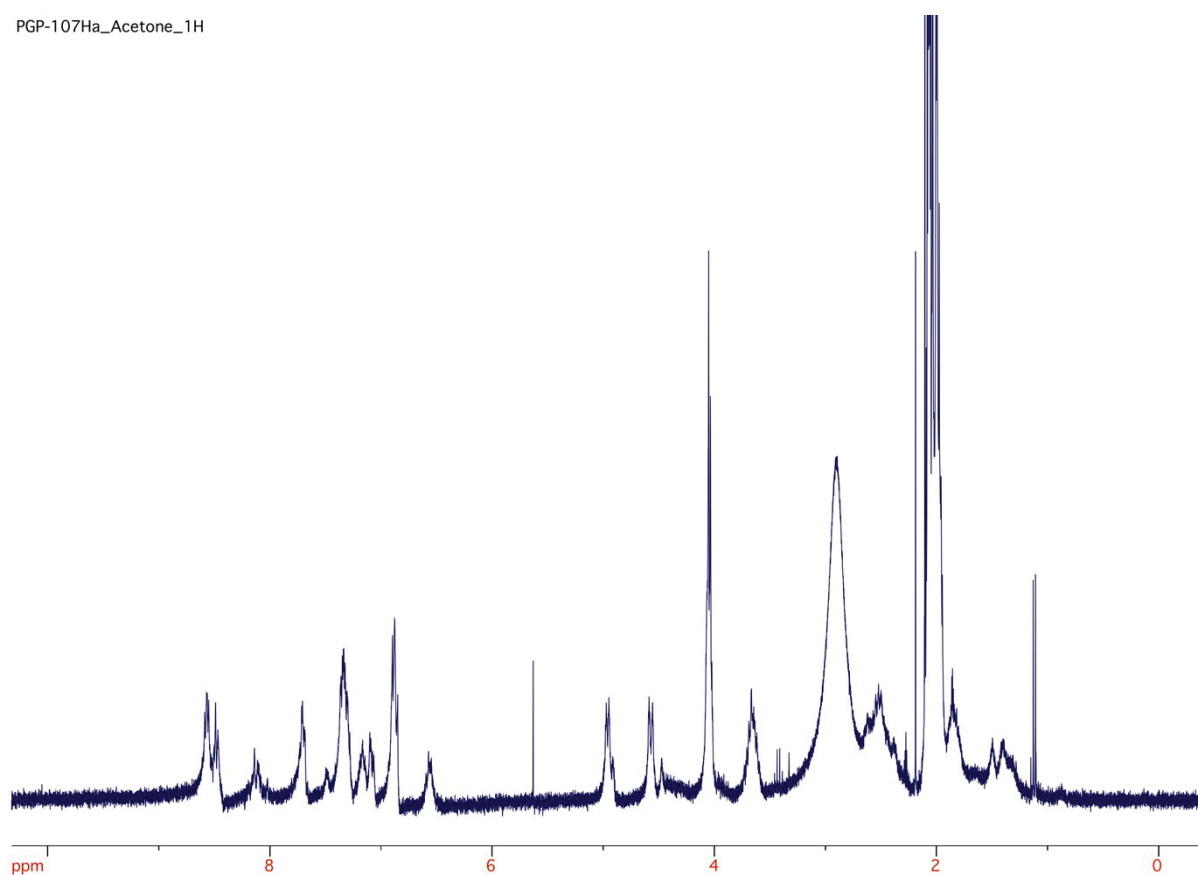

**Figure S3:**  $^1\text{H}$  NMR spectrum of **[5]** $[\text{PF}_6]_4$  in acetone- $d_6$ .

PGP-103Ha\_Acetone\_1H

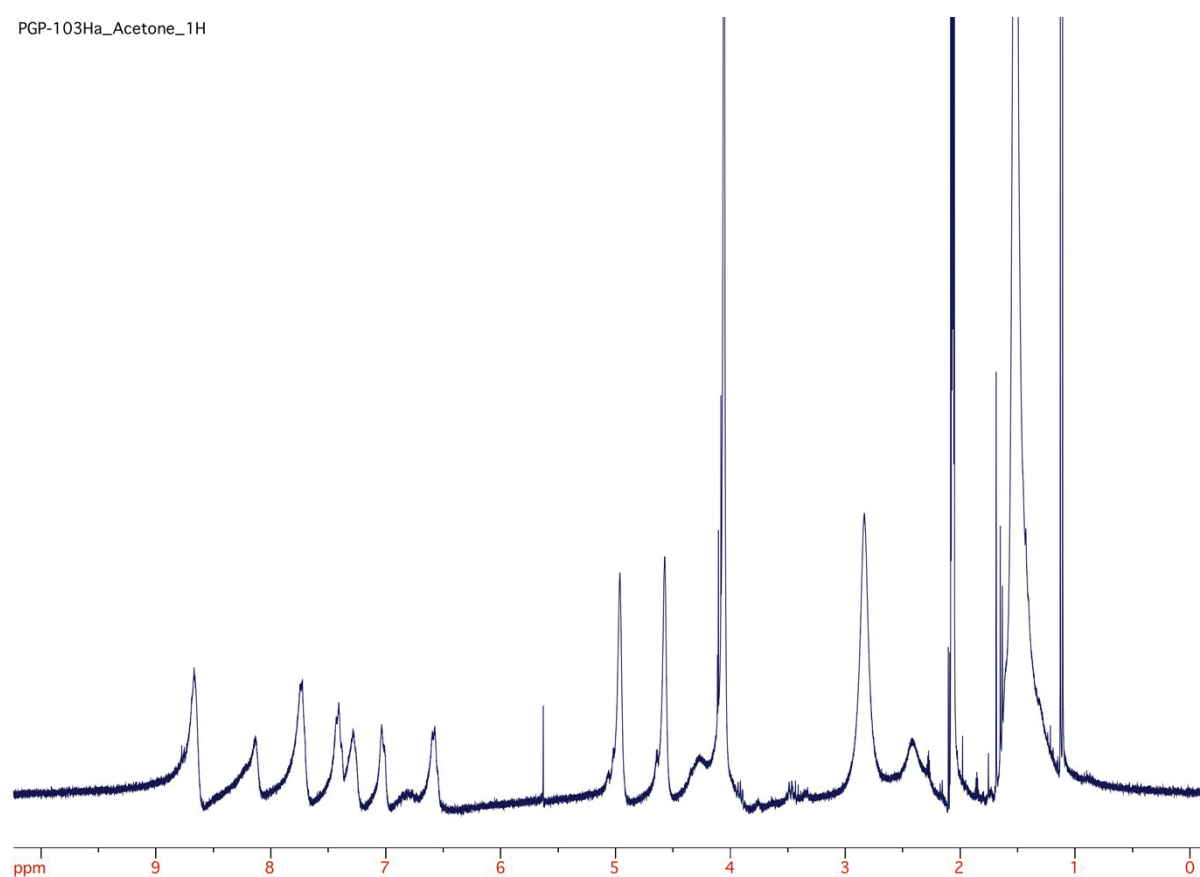

**Figure S4:**  $^1\text{H}$  NMR spectrum of  $[\mathbf{7}][\text{PF}_6]_4$  in acetone- $d_6$ .

PGP\_101Ha\_Acetone\_1H

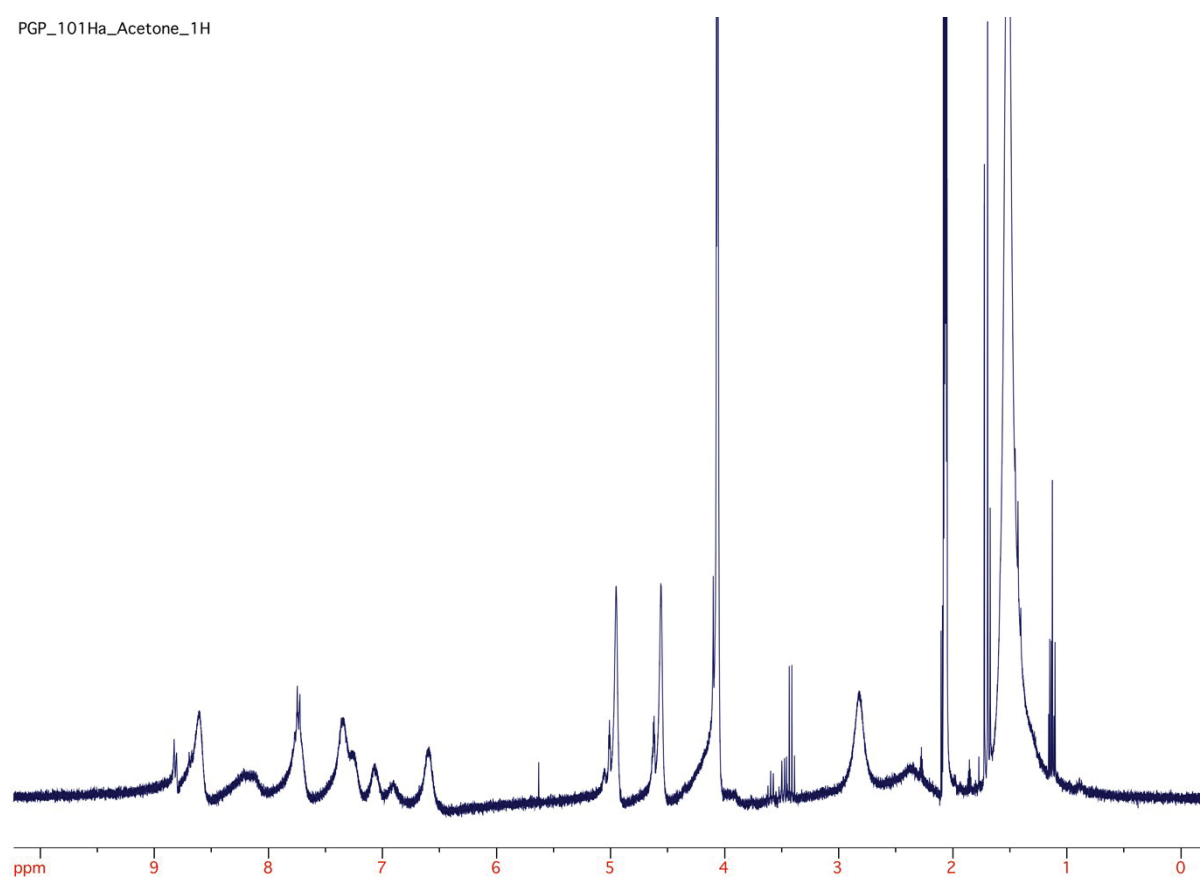

**Figure S5:**  $^1\text{H}$  NMR spectrum of **[9]** $[\text{PF}_6]$  in acetone- $d_6$ .

PGP-98Hb\_Acetone\_1H

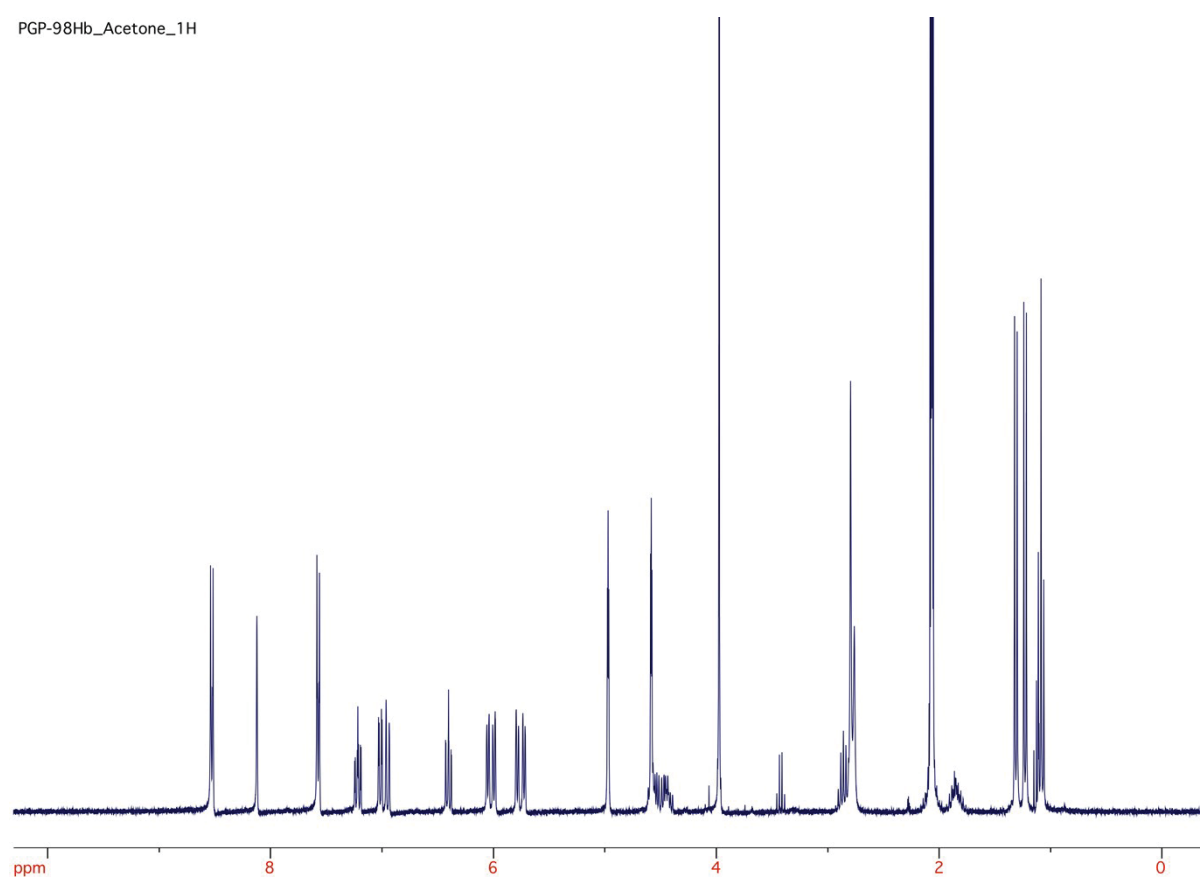

**Figure S6:**  $^1\text{H}$  NMR spectrum of **[10]** $[\text{PF}_6]$  in acetone- $d_6$ .

PGP-096Ha in D6-Acetone  
1H Spectrum  
Preshen

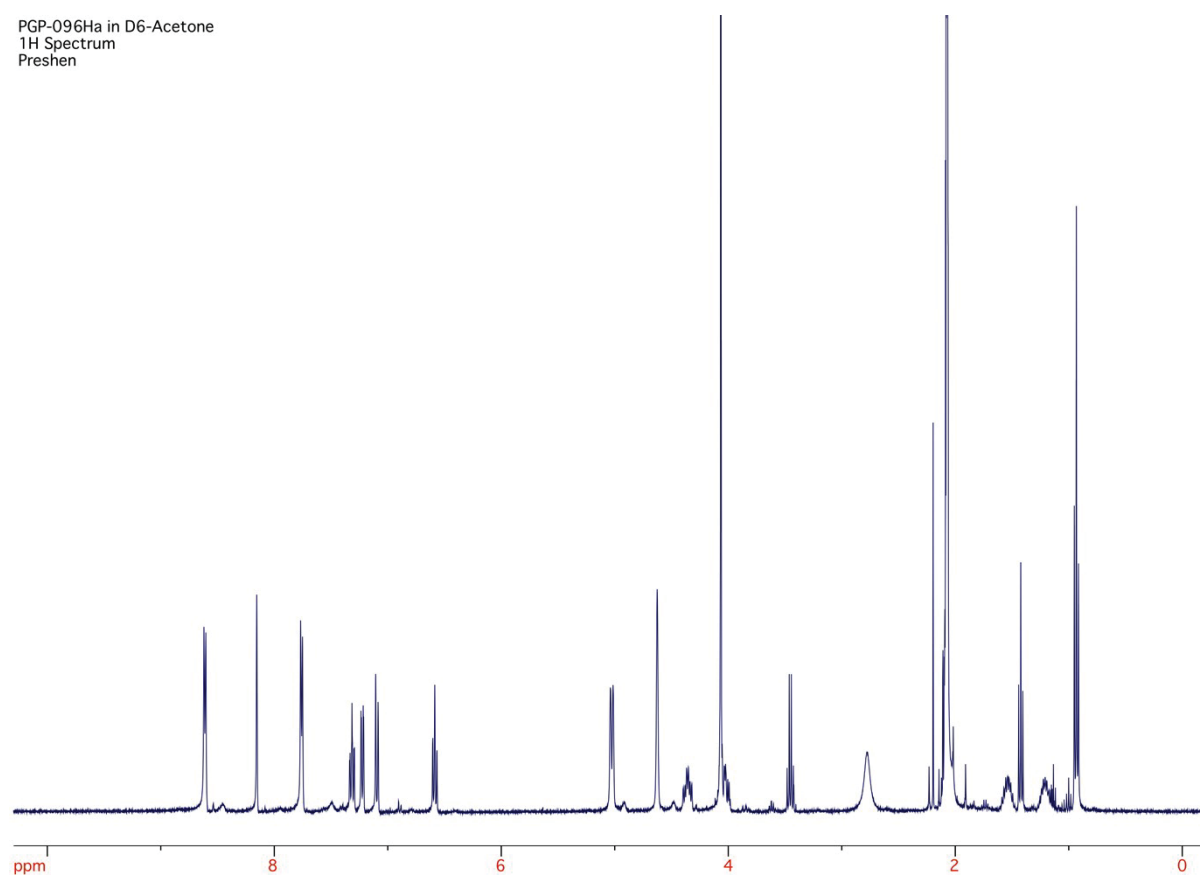

**Figure S7:**  $^1\text{H}$  NMR spectrum of **[11]** $[\text{PF}_6]$  in acetone- $d_6$ .

PGP-102Ha\_Acetone\_1H

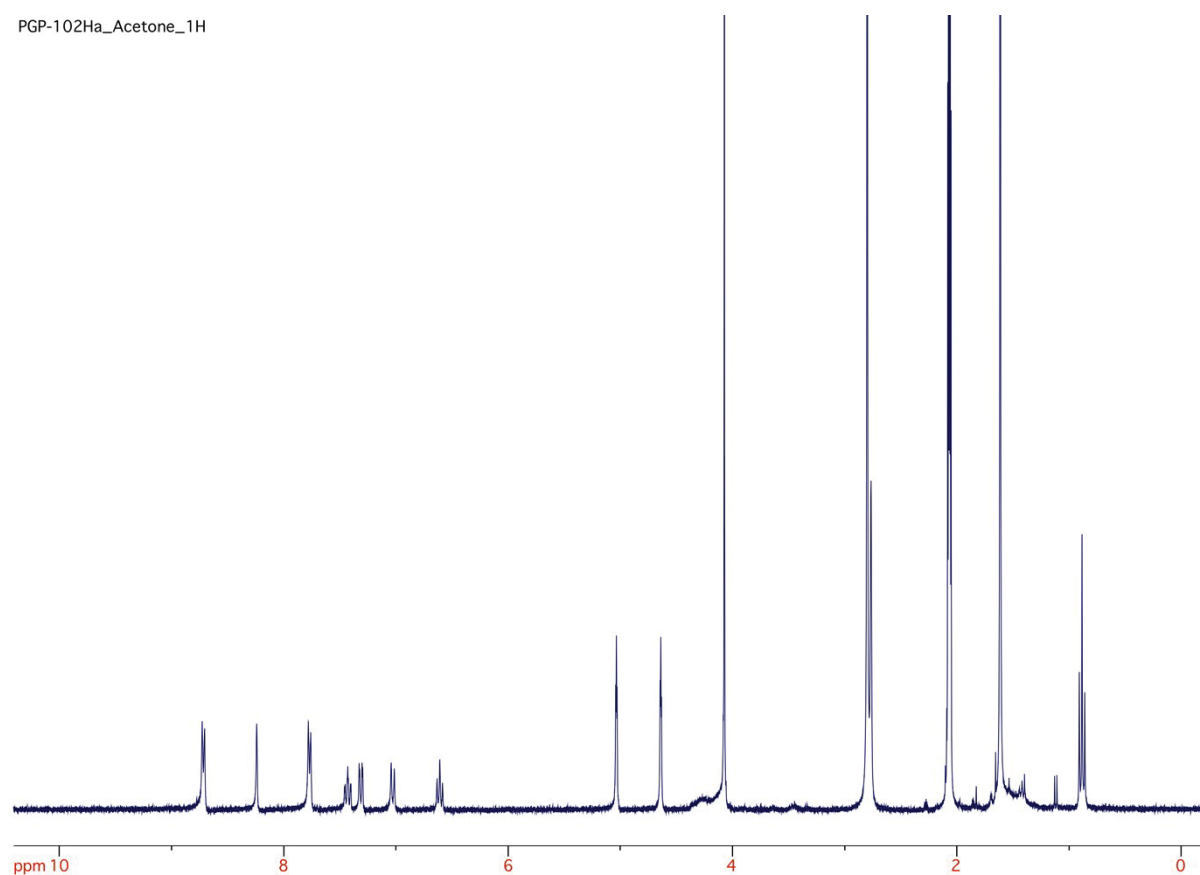



**Figure S8:**  $^1\text{H}$  NMR spectrum of **[12]** $[\text{PF}_6]$  in acetone- $d_6$ .

PGP-100Ha in D6-Acetone  
1H Spectrum  
Preshen

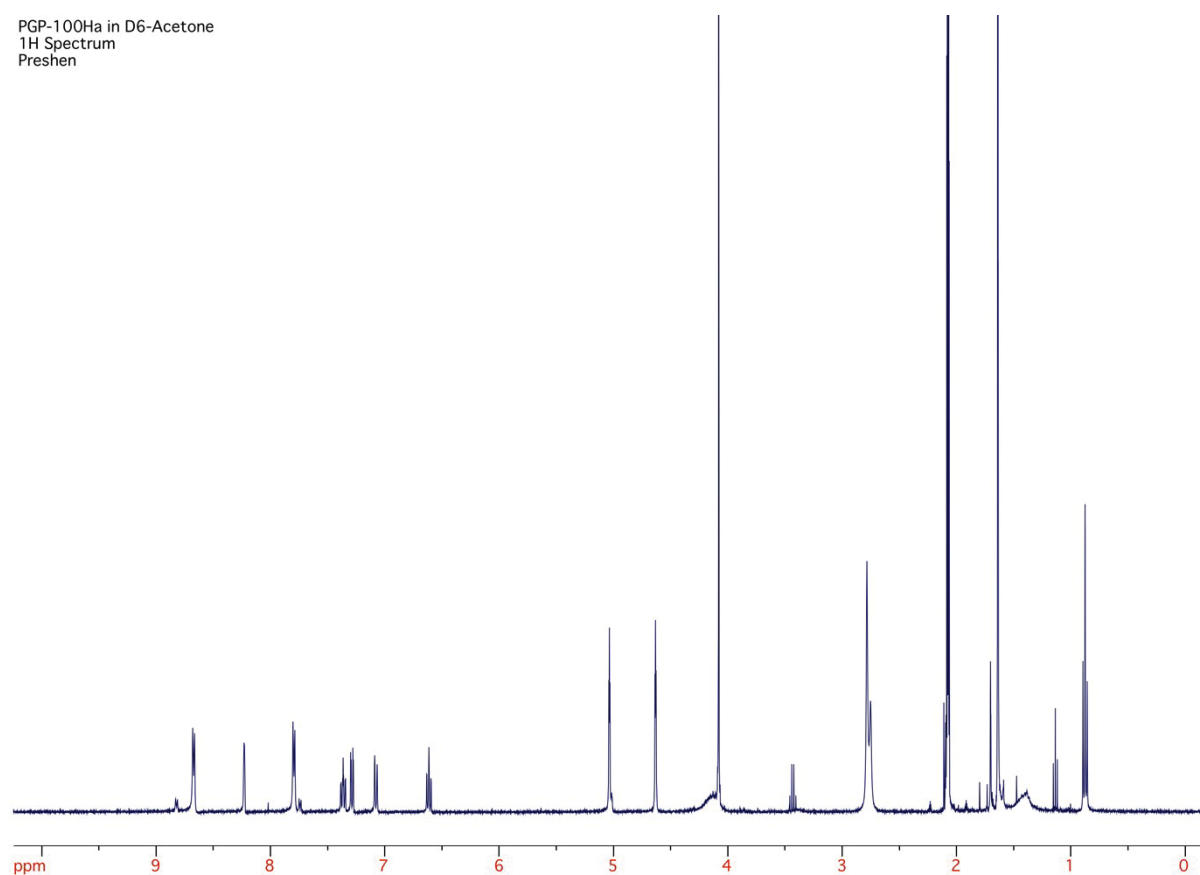

*Infrared spectra of selected metallodendrimers and their binuclear model complexes:*

**Figure S9:** Infrared spectrum of  $[1][PF_6]_4$  in the solid state.

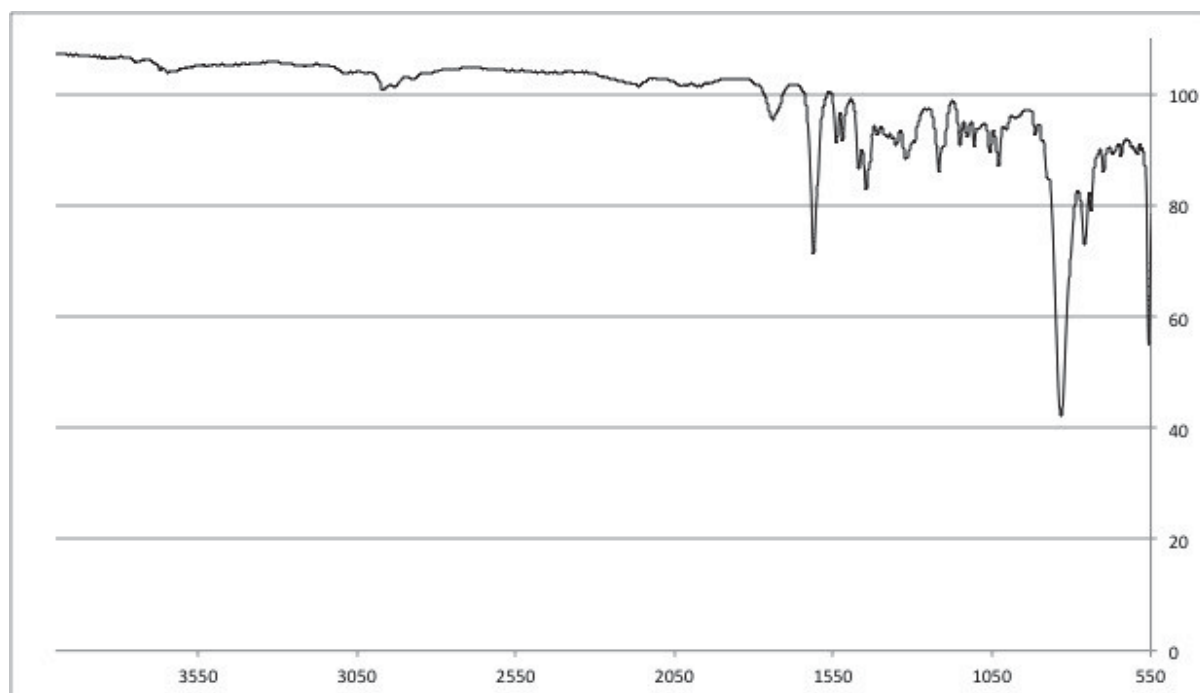

**Figure S10:** Infrared spectrum of  $[3][PF_6]_4$  in the solid state.

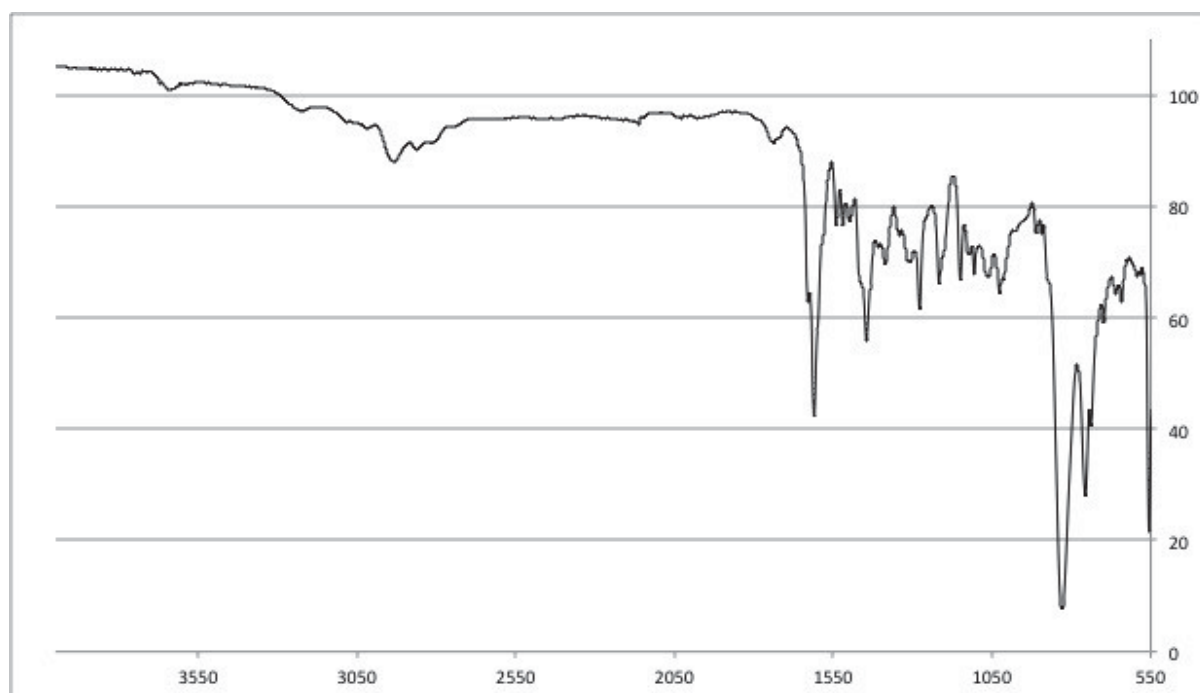

**Figure S11:** Infrared spectrum of  $[5][PF_6]_4$  in the solid state.

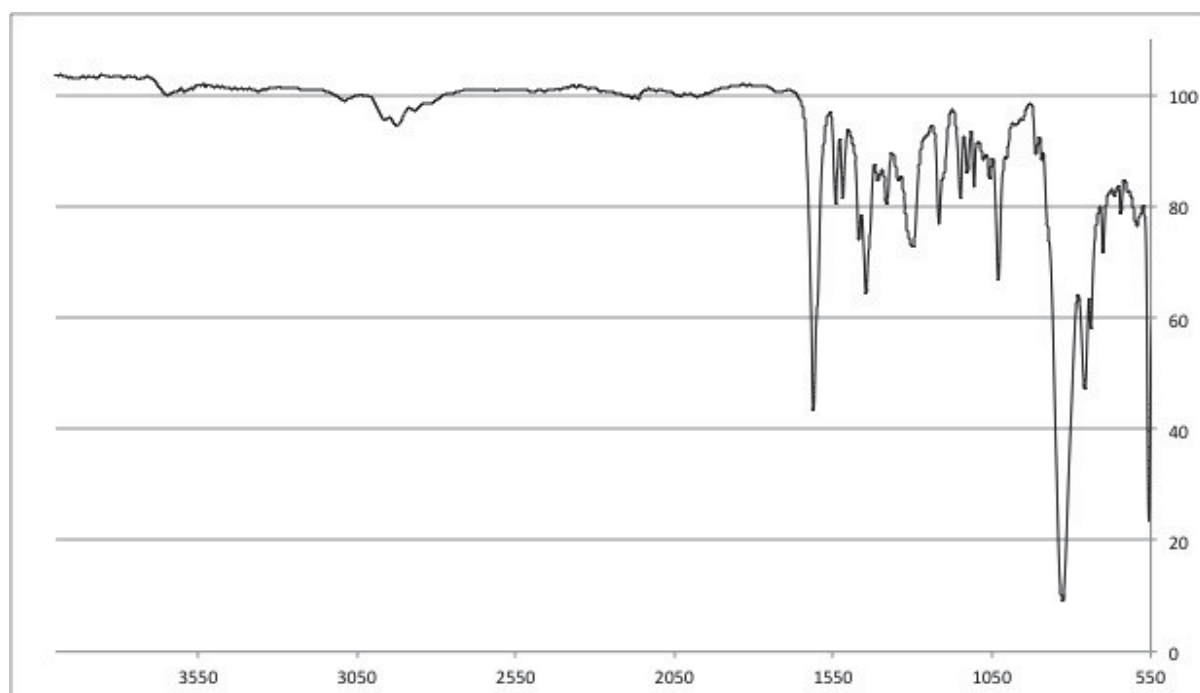

**Figure S12:** Infrared spectrum of  $[7][PF_6]_4$  in the solid state.

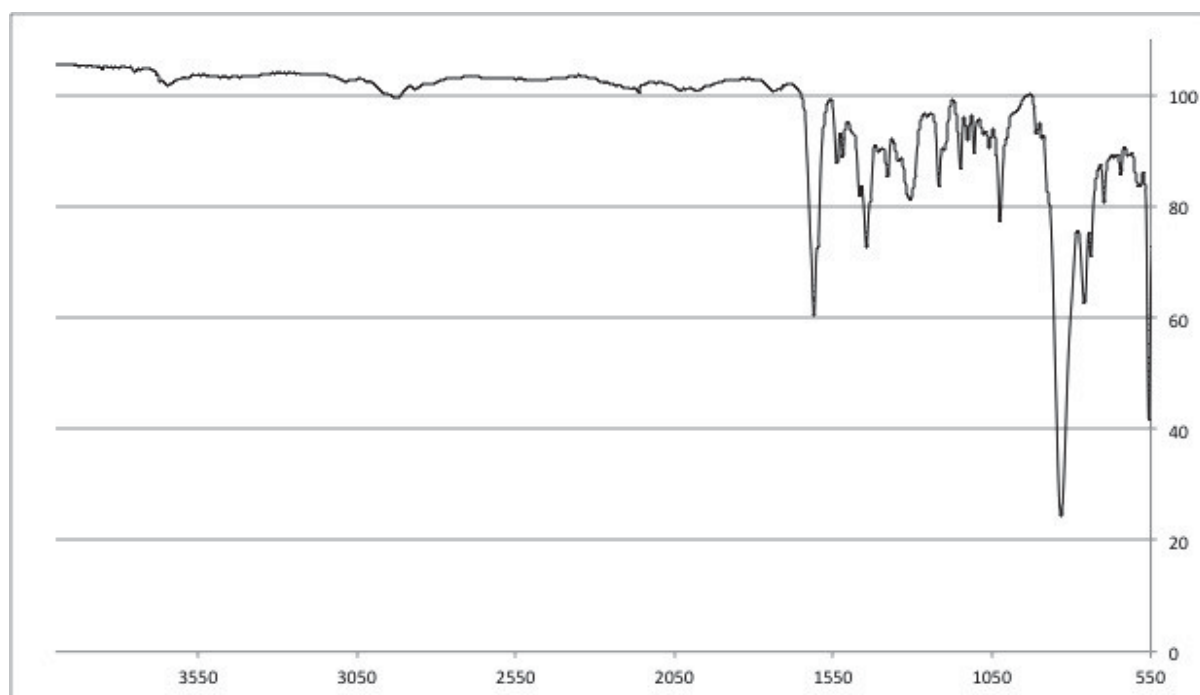

**Figure S13:** Infrared spectrum of [9][PF<sub>6</sub>] in the solid state.

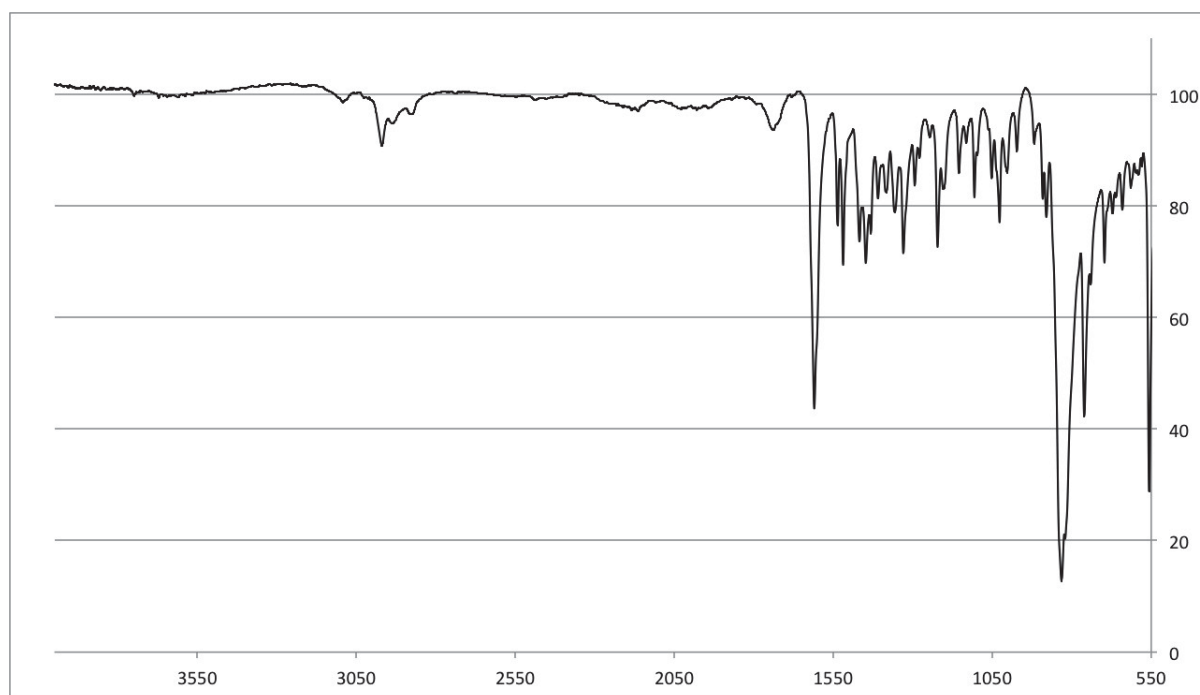

**Figure S14:** Infrared spectrum of **[10]**[PF<sub>6</sub>] in the solid state.

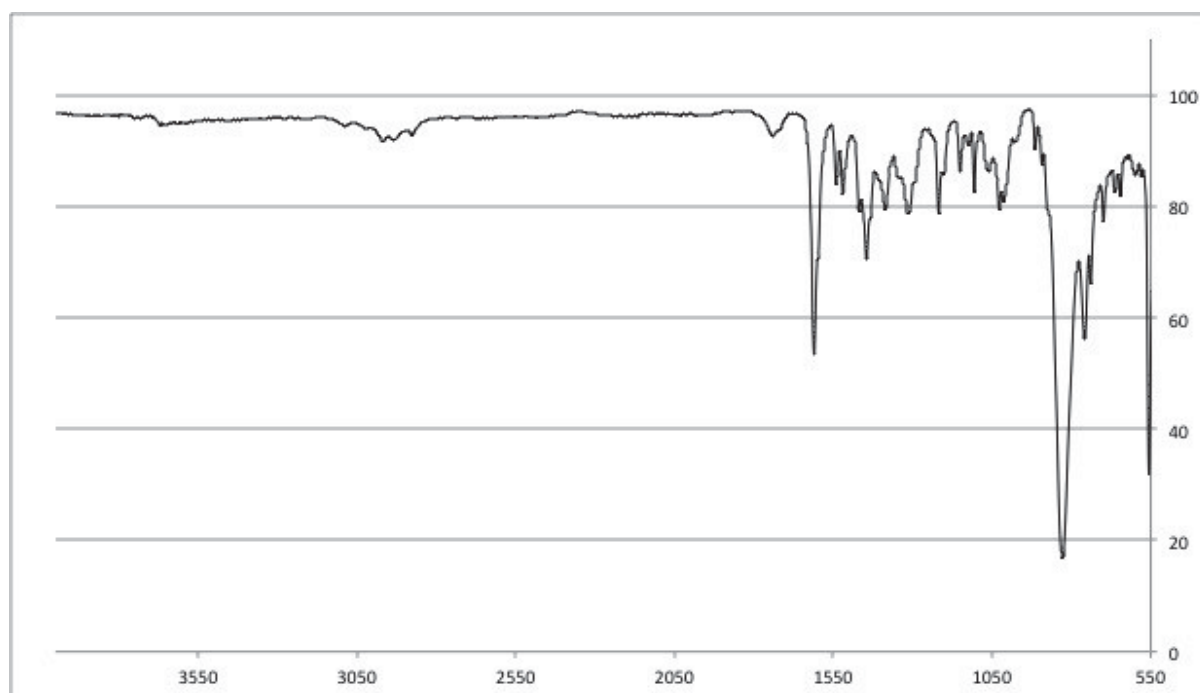

**Figure S15:** Infrared spectrum of **[11]**[PF<sub>6</sub>] in the solid state.

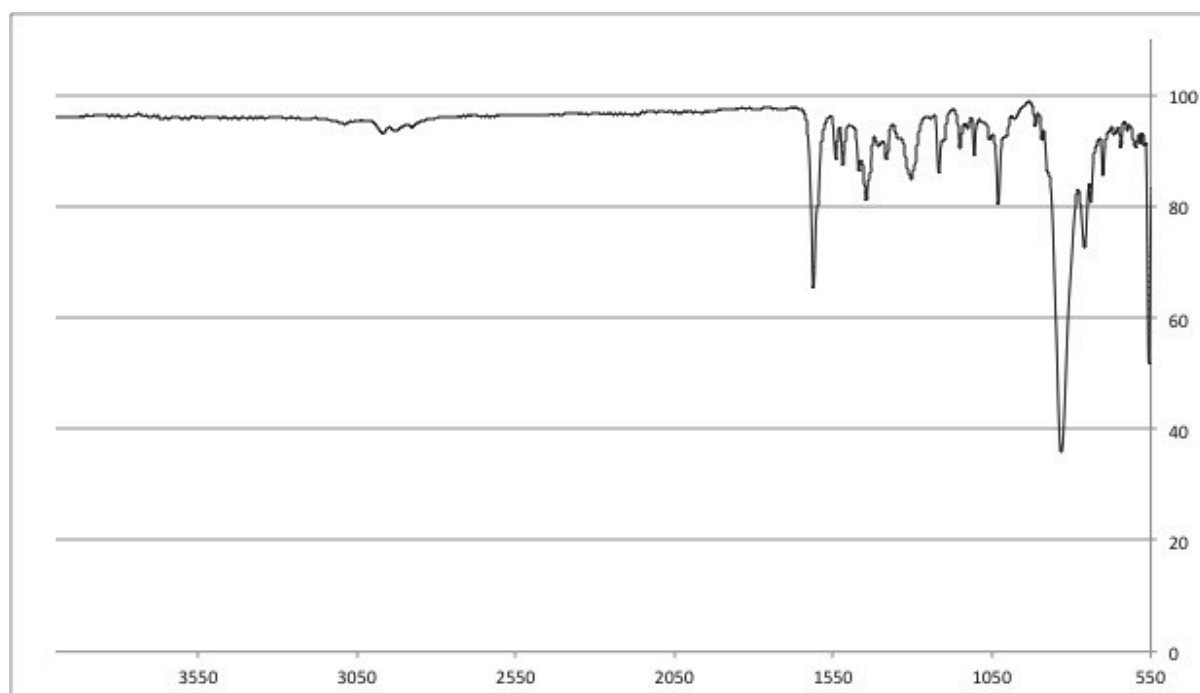



**Figure S16:** Infrared spectrum of **[12]**[PF<sub>6</sub>] in the solid state.

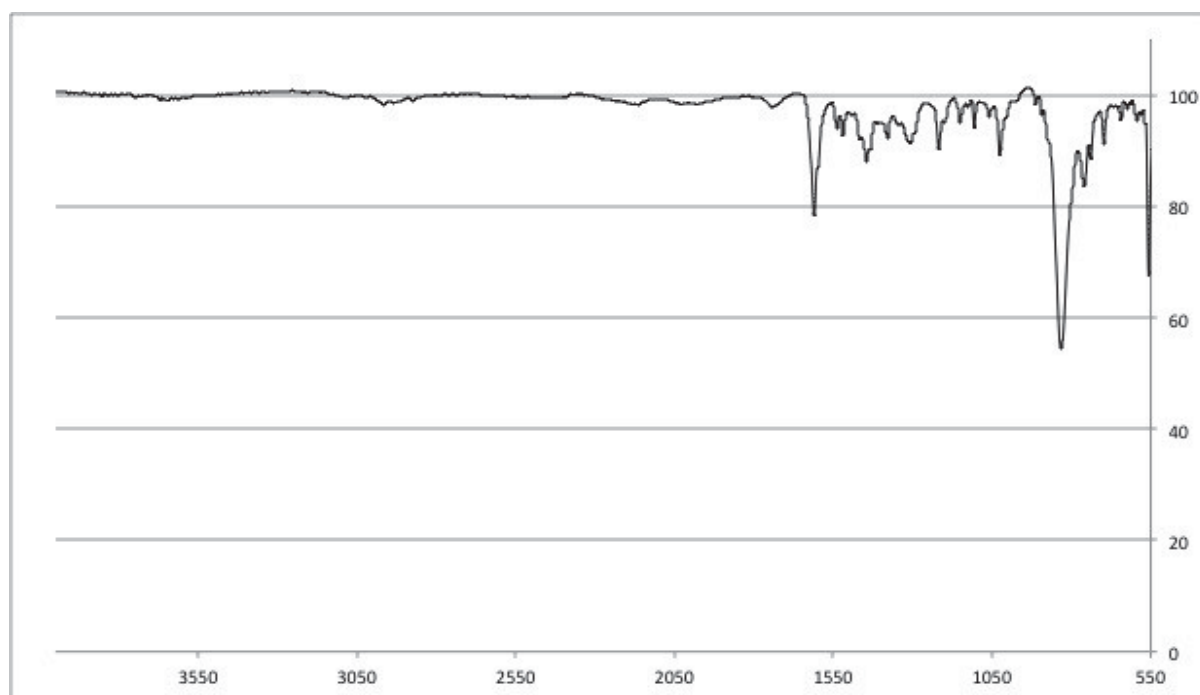

Supplement: c6dt00849f1.pdf [file c6dt00849f1.pdf]
